# Supplementary material for: Prediction of colorectal cancer diagnosis based on circulating plasma proteins
Source: PubMed Central journal article supplement (PMC4568950; doi:10.15252/emmm.201404873), 2015-08-07
Supplement: emmm0007-1166-sd1.pdf [file emmm0007-1166-sd1.pdf]

# Appendix

## Prediction of colorectal cancer diagnosis based on circulating plasma proteins

Silvia Surinova, Meena Choi, Sha Tao, Peter Schüffler, Ching-Yun Chang, Tim Clough, Kamil Vysloužil, Marta Dziechciarková, Josef Srovnal, Yansheng Liu, Mariette Matondo, Ruth Hüttenhain, Hendrik Weisser, Joachim Buhmann, Marián Hajdúch, Hermann Brenner, Olga Vitek, Ruedi Aebersold

### Table of contents

#### Appendix methods

Transformation of fold changes and standard errors from the log scale to the original scale

#### Appendix figures

**Appendix Fig. S1.** Preparation of tissue epithelia for proteomic analysis

**Appendix Fig. S2.** Multivariate logistic regression model used to evaluate the predictive ability of the biomarker signature

**Appendix Fig. S3.** Exhaustive search for all predictor models

**Appendix Fig. S4.** The relative intensities of the signature proteins

**Appendix Fig. S5.** Specificity evaluation of the control group in cohort 1

**Appendix Fig. S6.** The predictive ability of individual signature proteins

**Appendix Fig. S7.** Evaluation of the signature's predictive ability with or without age in the training and validation cohorts

**Appendix Fig. S8.** Comparative assessment of predictive ability of the protein biomarker signature and CEA in the validation cohort by cross validation

#### Appendix tables

**Appendix Table S1.** Patient cohort used for the discovery and screening of biomarker candidates

**Appendix Table S2.** Biomarker signature development within 10-fold cross validation (CV)

**Appendix Table S3.** Reproducibility assessment of biomarker signature development within 10- and 8-fold CV repeated three times

## Appendix methods

### Transformation of fold changes and standard errors from the log scale to the original scale

By Delta method,  
if the sequence of random variable,  $X_n$  satisfies,

$$\sqrt{n}[X_n - \theta] \xrightarrow{D} \mathcal{N}(0, \sigma^2)$$

where  $\theta$  and  $\sigma^2$  are finite valued constants then,

$$\sqrt{n}[g(X_n) - g(\theta)] \xrightarrow{D} \mathcal{N}(0, \sigma^2 [g'(\theta)]^2)$$

in our case,

$$X_n = \log_2(Y_n)$$

where,  $Y_n$  is original scale fold change, and  $X_n$  is log 2 transformed fold change. Then,

$$Y_n = g(X_n) = 2^{X_n}$$

$$g(\theta) = 2^\theta$$

$$g'(\theta) = (2^\theta)' = \ln(2)2^\theta$$

Therefore, FC with original scale =  $2^{\log_2 \text{FC}}$ , and SE with original scale =  $\text{SE} \log_2 \text{scale} \times \ln(2)2^{\log_2 \text{FC}}$ .

| Training | log2 FC | SE for log2 | FC      | SE for original |
|----------|---------|-------------|---------|-----------------|
| CP       | 0.38098 | 0.0507      | 1.3022  | 0.04577         |
| PON1     | -0.1304 | 0.0617      | 0.91359 | 0.03908         |
| SERPINA3 | 0.3592  | 0.06251     | 1.2827  | 0.05558         |
| LRG1     | 0.3066  | 0.03368     | 1.2368  | 0.02887         |
| TIMP1    | 0.2503  | 0.03178     | 1.1894  | 0.0262          |

| Validation | log2 FC   | SE for log2 | FC       | SE for original |
|------------|-----------|-------------|----------|-----------------|
| CP         | 0.70048   | 0.03015     | 1.6251   | 0.03396         |
| PON1       | -0.272    | 0.05618     | 0.8282   | 0.03225         |
| SERPINA3   | 0.2855    | 0.04792     | 1.2188   | 0.04048         |
| LRG1       | 0.5974    | 0.03445     | 1.513016 | 0.036134        |
| TIMP1      | 0.5188795 | 0.042727    | 1.4328   | 0.042435        |

## Appendix figures

**Appendix Fig. S1.** Preparation of tissue epithelia for proteomic analysis. Formalin-fixed 7 $\mu$ m sections were stained with Hematoxylin-Eosin to determine tissue orientation, and adjacent 40 $\mu$ m sections were manually dissected and compiled under denaturing conditions. Left and right image was taken prior and during dissection, respectively.

**Appendix Fig. S2.** Multivariate logistic regression model used to evaluate the predictive ability of the biomarker signature. The parameters of the logistic regression model and the standard errors of these parameters based on the logistic regression model fit are reported.

**Appendix Fig. S3.** Exhaustive search for all predictor models. All hypothetical 1-5 protein logistic regression models were collected brute force search and validated by 100-fold bootstrap cross-validation. Proteins were ranked by their median AUROC. The protein occurrence in models

represents proteins most frequently selected into the most 2097 high performing predictor models. Proteins in bold present the proteins from the diagnostic protein signature.

**Appendix Fig. S4.** The relative intensities of the signature proteins. The log<sub>2</sub> intensities have been estimated from the linear model. Boxplots of the signature proteins significant between the groups of CRC and control subjects were plotted for the a, training, and b, validation data set.

**Appendix Fig. S5.** Specificity evaluation of the control group in cohort 1. a, The training data set was partitioned into five folds and the protein biomarker signature was used to classify all the subjects of the training cohort and also specific control subsets in detail. The subject with hyperplastic polyps and non-advanced adenomas were grouped into a group of subjects with 'pre-lesions'. Subjects with a negative colonoscopy test were assigned to the 'no lesion' group. The specificity of prediction was evaluated and fold 2 (in bold) represents the pseudomedian fold of the cross validation procedure. b, An additional cohort of subjects with advanced adenomas (n=50) was used as a new validation cohort of control subjects. The protein biomarker signature was used to classify these subjects.

**Appendix Fig. S6.** The predictive ability of individual signature proteins. Areas under the ROC curves were obtained from predictors of individual proteins on the validation data set.

**Appendix Fig. S7.** Evaluation of the signature's predictive ability with or without age in the training and validation cohorts. Using the original data subsets, proteins were selected into predictive models with or without age within 10-fold cross validation. Proteins selected in at least five folds are listed. The parameters of the model with age are reported. The difference in areas under the ROC curves resulting from the two model predictions is assessed.

**Appendix Fig. S8.** Comparative assessment of predictive ability of the protein biomarker signature and CEA in the validation cohort by cross validation. CRC and control subjects with CEA measurements (n=192) were classified with CEA, the protein biomarker signature, or a combination of CEA + signature. a, The cross-validated performance within 10 folds is reported for each of the predictors. b, The pseudomedian areas under the ROC curve for each of the cross-validated predictions and the areas between the 25<sup>th</sup> and 75<sup>th</sup> percentile are plotted. The mean differences in AUC values were statistically tested by a paired t-test and the p-values were assessed by 2000 bootstrap repetitions.

## Appendix tables

**Appendix Table S1.** Patient cohort used for the discovery and screening of biomarker candidates. Patients are grouped according to clinical stage into a disease progression group (early or advanced) and a disease localization group (localized or metastatic). Patients used in the discovery phase (1) and/or screening phase (2) of the study are indicated. Age represents subject's age at diagnosis.

| Patient # | Gender | Age | Progression | Localization | Stage | Study phase |
|-----------|--------|-----|-------------|--------------|-------|-------------|
| 1         | M      | 61  | Advanced    | Metastatic   | IV    | 1           |
| 2         | M      | 66  | Advanced    | Localized    | II    | 2           |
| 3         | M      | 68  | Advanced    | Localized    | II    | 1           |
| 4         | M      | 82  | Advanced    | Localized    | III   | 2           |
| 5         | M      | 58  | Advanced    | Localized    | III   | 1+2         |
| 6         | M      | 65  | Advanced    | Localized    | II    | 1+2         |
| 7         | M      | 79  | Advanced    | Metastatic   | IV    | 1           |
| 8         | F      | 66  | Early       | Localized    | I     | 1+2         |
| 9         | M      | 70  | Advanced    | Localized    | II    | 2           |
| 10        | F      | 47  | Early       | Localized    | I     | 1+2         |
| 11        | M      | 73  | Early       | Localized    | I     | 1+2         |
| 12        | M      | 70  | Early       | Localized    | I     | 1+2         |
| 13        | M      | 55  | Early       | Localized    | I     | 1+2         |
| 14        | M      | 56  | Early       | Localized    | I     | 1+2         |
| 15        | F      | 78  | Advanced    | Metastatic   | IV    | 2           |
| 16        | M      | 57  | Early       | Localized    | I     | 1+2         |
| 17        | M      | 79  | Advanced    | Localized    | III   | 1+2         |
| 18        | M      | 72  | Early       | Localized    | I     | 2           |
| 19        | M      | 57  | Early       | Localized    | I     | 1+2         |
| 20        | F      | 52  | Early       | Localized    | I     | 2           |
| 21        | F      | 72  | Early       | Localized    | I     | -           |
| 22        | F      | 53  | Early       | Localized    | I     | 1+2         |
| 23        | F      | 51  | Advanced    | Metastatic   | IV    | -           |
| 24        | M      | 54  | Early       | Localized    | I     | 1+2         |

**Appendix Table S2.** Biomarker signature development within 10-fold cross validation (CV). **a**, Differentially abundant proteins characterized as significant in the individual folds of the training dataset. **b**, Proteins selected into logistic regression models in individual folds. The consensus model contains proteins with a high frequency of occurrence in the individual folds. AUC values are reported.

| <b>a</b> | <b>Significant proteins for each fold (FDR&lt;0.05, fold change cut-off <math>\pm</math>1.1)</b>                |
|----------|-----------------------------------------------------------------------------------------------------------------|
| Fold     | Differentially abundant proteins                                                                                |
| 1        | A1AG2,CP,CTSD,ECM1,FHR3,HP,ITIH4,LGALS3BP,LRG1,MMRN1,ORM1,PON1,SERPINA1,SERPINA3,THBS1,TIMP1,CD44,CFH           |
| 2        | A1AG2,CD44,CFH,CP,CTSD,ECM1,FHR3,HP,ITIH4,LGALS3BP,LRG1,MMRN1,ORM1,SERPINA1,SERPINA3,TIMP1,SERPINA7,F5          |
| 3        | A1AG2,CD44,CFH,CP,CTSD,ECM1,FGG,FHR3,HP,ITIH4,LGALS3BP,LRG1,MMRN1,ORM1,SERPINA1,SERPINA3,TIMP1,VTN              |
| 4        | A1AG2,CFH,CP,CTSD,ECM1,FHR3,ITIH4,LGALS3BP,LRG1,MMRN1,ORM1,SERPINA1,SERPINA3,TIMP1,HP,CD44,PRG4                 |
| 5        | A1AG2,CP,CTSD,ECM1,FHR3,FN1,ITIH4,LGALS3BP,LRG1,MMRN1,ORM1,PON1,SERPINA1,SERPINA3,TIMP1,HP,CD44,PRG4            |
| 6        | A1AG2,CFH,CP,CTSD,ECM1,FHR3,FN1,HP,IGHG2,ITIH4,LGALS3BP,LRG1,MMRN1,ORM1,PON1,SERPINA1,SERPINA3,TIMP1,CD44,FCGBP |
| 7        | A1AG2,CP,CTSD,ECM1,FHR3,IGHG2,ITIH4,LGALS3BP,LRG1,MMRN1,ORM1,PON1,SERPINA1,SERPINA3,TIMP1,CFH,CD44              |
| 8        | A1AG2,CFH,CP,CTSD,ECM1,FHR3,ITIH4,LGALS3BP,LRG1,MMRN1,ORM1,PON1,SERPINA1,SERPINA3,TIMP1,CD44,F5,HP              |
| 9        | A1AG2,CP,CTSD,ECM1,FHR3,FN1,IGHA2,IGHG2,LGALS3BP,LRG1,MMRN1,ORM1,PON1,SERP                                      |

| PINA1,SERPINA3,TIMP1,CD44,HP,PRG4 |                                                                                                |                               |                                 |                      |                        |
|-----------------------------------|------------------------------------------------------------------------------------------------|-------------------------------|---------------------------------|----------------------|------------------------|
| 10                                | A1AG2,CFH,CP,CTSD,ECM1,FHR3,FN1,ITIH4,LGALS3BP,LRG1,MMRN1,ORM1,SERPINA1,SERPINA3,TIMP1,HP,CD44 |                               |                                 |                      |                        |
| <b>b</b>                          | <b>Significant proteins selected into logistic regression models by stepwise selection</b>     |                               |                                 |                      |                        |
| Fold                              | Predictive logistic regression models                                                          | Sub-Training (9/10 dataset 1) | Sub-Validation (1/10 dataset 1) | Training (dataset 1) | Validation (dataset 2) |
| 1                                 | CP+LRG1+PON1+SERPINA3                                                                          | 0.75                          | 0.75                            | 0.75                 | 0.83                   |
| 2                                 | CD44+CP+ITIH4+LRG1+ORM1                                                                        | 0.73                          | 0.55                            | 0.72                 | 0.82                   |
| 3                                 | CP+FGG+HP+ITIH4+ORM1+TIMP1                                                                     | 0.73                          | 0.48                            | 0.71                 | 0.82                   |
| 4                                 | LRG1+MMRN1+ORM1+PRG4                                                                           | 0.75                          | 0.61                            | 0.73                 | 0.80                   |
| 5                                 | CP+PON1+SERPINA3+TIMP1                                                                         | 0.75                          | 0.73                            | 0.74                 | 0.84                   |
| 6                                 | CP+CTSD+IGHG2+PON1+SERPINA3                                                                    | 0.76                          | 0.72                            | 0.76                 | 0.84                   |
| 7                                 | CP+IGHG2+PON1+SERPINA3+TIMP1                                                                   | 0.77                          | 0.68                            | 0.77                 | 0.85                   |
| 8                                 | CP+ECM1+PON1+SERPINA3                                                                          | 0.75                          | 0.43                            | 0.74                 | 0.81                   |
| 9                                 | CP+IGHA2+IGHG2+LGALS3BP+PON1+SERPINA3                                                          | 0.79                          | 0.74                            | 0.77                 | 0.85                   |
| 10                                | CP+FHR3+FN1+ITIH4+LRG1+TIMP1                                                                   | 0.75                          | 0.54                            | 0.72                 | 0.84                   |
| Consensus                         | CP+PON1+SERPINA3+LRG1+TIMP1                                                                    |                               |                                 | 0.75                 | 0.84                   |

**Appendix Table S3.** Reproducibility assessment of biomarker signature development within 10- and 8-fold CV repeated three times. AUC values are reported.

| <b>Try 1 10-fold CV</b>                                                                    |                                                                  |                               |                                 |                      |                        |
|--------------------------------------------------------------------------------------------|------------------------------------------------------------------|-------------------------------|---------------------------------|----------------------|------------------------|
| <b>Significant proteins selected into logistic regression models by stepwise selection</b> |                                                                  |                               |                                 |                      |                        |
| Fold                                                                                       | Predictive logistic regression models                            | Sub-Training (9/10 dataset 1) | Sub-Validation (1/10 dataset 1) | Training (dataset 1) | Validation (dataset 2) |
| 1                                                                                          | CFH + CP + ECM1 + FN1 + LGALS3BP + LRG1 + ORM1 + PON1 + SERPINA3 | 0.81                          | 0.65                            |                      |                        |
| 2                                                                                          | CP + IGHG2 + PON1 + SERPINA3 + TIMP1                             | 0.77                          | 0.63                            |                      |                        |
| 3                                                                                          | CP + ITIH4 + LRG1 + TIMP1                                        | 0.72                          | 0.67                            |                      |                        |
| 4                                                                                          | CP + IGHG2 + MMRN1 + PON1 + SERPINA3 + PRG4                      | 0.77                          | 0.8                             |                      |                        |
| 5                                                                                          | CP + ITIH4 + LRG1 + MMRN1                                        | 0.72                          | 0.62                            |                      |                        |
| 6                                                                                          | CP + ITIH4 + LRG1 + TIMP1                                        | 0.71                          | 0.72                            |                      |                        |
| 7                                                                                          | CP + ITIH4 + LRG1                                                | 0.71                          | 0.64                            |                      |                        |
| 8                                                                                          | CP + ITIH4 + LRG1 + TIMP1                                        | 0.73                          | 0.56                            |                      |                        |
| 9                                                                                          | CP + ITIH4 + LRG1 + TIMP1                                        | 0.70                          | 0.8                             |                      |                        |
| 10                                                                                         | CP + IGHG2 + ITIH4 + LRG1 + TIMP1                                | 0.71                          | 0.86                            |                      |                        |
| Consensus                                                                                  | CP+LRG1+ITIH4+TIMP1                                              |                               |                                 | 0.71                 | 0.83                   |
| <b>Try 2 10-fold CV</b>                                                                    |                                                                  |                               |                                 |                      |                        |
| <b>Significant proteins selected into logistic regression models by stepwise selection</b> |                                                                  |                               |                                 |                      |                        |
| Fold                                                                                       | Predictive logistic regression models                            | Sub-Training (9/10 dataset 1) | Sub-Validation (1/10 dataset 1) | Training (dataset 1) | Validation (dataset 2) |
| 1                                                                                          | CP + PON1 + TIMP1 + SERPINA3 + PRG4                              | 0.75                          | 0.71                            |                      |                        |
| 2                                                                                          | LGALS3BP + MMRN1 + ORM1 + PRG4                                   | 0.73                          | 0.45                            |                      |                        |
| 3                                                                                          | IGHA2 + LGALS3BP + ORM1                                          | 0.73                          | 0.64                            |                      |                        |

|           |                                                  |      |      |      |      |
|-----------|--------------------------------------------------|------|------|------|------|
|           | + TIMP1 + PRG4                                   |      |      |      |      |
| 4         | CP + IGHG2 + PON1 + SERPINA3                     | 0.77 | 0.70 |      |      |
| 5         | CP + ITIH4 + LRG1 + TIMP1                        | 0.72 | 0.63 |      |      |
| 6         | CP + ITIH4 + LRG1                                | 0.72 | 0.63 |      |      |
| 7         | A1AG2 + CP + ITIH4 + ORM1 + SERPINA3 + TIMP1     | 0.74 | 0.63 |      |      |
| 8         | A1AG2 + CP + ITIH4 + LRG1 + ORM1                 | 0.73 | 0.57 |      |      |
| 9         | CP + ITIH4 + LRG1 + ORM1 + TIMP1                 | 0.74 | 0.56 |      |      |
| 10        | CP + ECM1 + IGHG2 + LRG1 + PON1 + SERPINA3 + CFH | 0.78 | 0.67 |      |      |
| Consensus | CP+LRG1+ITIH4+TIMP1+ORM1                         |      |      | 0.72 | 0.83 |

|                             |                                                                                            |                               |                                 |                      |                        |
|-----------------------------|--------------------------------------------------------------------------------------------|-------------------------------|---------------------------------|----------------------|------------------------|
| <b>Try 3<br/>10-fold CV</b> | <b>Significant proteins selected into logistic regression models by stepwise selection</b> |                               |                                 |                      |                        |
| Fold                        | Predictive logistic regression models                                                      | Sub-Training (9/10 dataset 1) | Sub-Validation (1/10 dataset 1) | Training (dataset 1) | Validation (dataset 2) |
| 1                           | CP + ITIH4 + LRG1 + ORM1 + TIMP1 + PRG4                                                    | 0.78                          | 0.56                            |                      |                        |
| 2                           | CP + IGHG2 + PON1 + SERPINA3                                                               | 0.78                          | 0.63                            |                      |                        |
| 3                           | CP + IGHG2 + PON1 + SERPINA3 + TIMP1                                                       | 0.78                          | 0.64                            |                      |                        |
| 4                           | CP + LRG1 + TIMP1 + PRG4                                                                   | 0.73                          | 0.64                            |                      |                        |
| 5                           | CP + IGHG2 + PON1 + SERPINA3                                                               | 0.75                          | 0.81                            |                      |                        |
| 6                           | CP + LRG1 + PON1 + SERPINA3                                                                | 0.75                          | 0.80                            |                      |                        |
| 7                           | CP + FHR3 + ITIH4 + ORM1 + TIMP1                                                           | 0.70                          | 0.69                            |                      |                        |
| 8                           | CP + CTSD + FGG + IGHA2 + ITIH4 + SERPINA3 + TIMP1 + PLTP + FCGBP                          | 0.79                          | 0.43                            |                      |                        |
| 9                           | A1AG2 + CP + ITIH4 + LRG1 + ORM1                                                           | 0.74                          | 0.55                            |                      |                        |
| 10                          | CP + IGHG2 + LGALS3BP + PON1 + SERPINA3 + PRG4                                             | 0.77                          | 0.74                            |                      |                        |
| Consensus                   | CP+SERPINA3+TIMP1+PON1                                                                     |                               |                                 | 0.74                 | 0.83                   |

|                            |                                                                                            |                               |                                 |                      |                        |
|----------------------------|--------------------------------------------------------------------------------------------|-------------------------------|---------------------------------|----------------------|------------------------|
| <b>Try 1<br/>8-fold CV</b> | <b>Significant proteins selected into logistic regression models by stepwise selection</b> |                               |                                 |                      |                        |
| Fold                       | Predictive logistic regression models                                                      | Sub-Training (9/10 dataset 1) | Sub-Validation (1/10 dataset 1) | Training (dataset 1) | Validation (dataset 2) |
| 1                          | CP + IGHG2 + PON1 + SERPINA3 + VWF                                                         | 0.7518                        | 0.7929                          |                      |                        |
| 2                          | A1AG2 + CP + ITIH4 + LRG1 + ORM1 + TIMP1                                                   | 0.7232                        | 0.7337                          |                      |                        |
| 3                          | CP + MMRN1 + PON1 + SERPINA3                                                               | 0.7569                        | 0.6509                          |                      |                        |
| 4                          | CP + IGHG2 + PON1 + SERPINA3 + PRG4                                                        | 0.7997                        | 0.5799                          |                      |                        |
| 5                          | CP + FN1 + ITIH4 + LRG1 + SERPINA3 + TIMP1                                                 | 0.7513                        | 0.5417                          |                      |                        |
| 6                          | CP + ITIH4 + LRG1                                                                          | 0.738                         | 0.5139                          |                      |                        |
| 7                          | CP + MMRN1 + PON1 + SERPINA3                                                               | 0.7424                        | 0.7222                          |                      |                        |
| 8                          | CP + PON1 + SERPINA3                                                                       | 0.7491                        | 0.6458                          |                      |                        |
| Consensus                  | CP+PON1+SERPINA3+LRG1+ITIH4                                                                |                               |                                 | 0.7528               | 0.8318                 |

|              |                                                                                            |  |  |  |  |
|--------------|--------------------------------------------------------------------------------------------|--|--|--|--|
| <b>Try 2</b> | <b>Significant proteins selected into logistic regression models by stepwise selection</b> |  |  |  |  |
|--------------|--------------------------------------------------------------------------------------------|--|--|--|--|

| <b>8-fold CV</b>       |                                                                                            |                               |                                 |                      |                        |
|------------------------|--------------------------------------------------------------------------------------------|-------------------------------|---------------------------------|----------------------|------------------------|
| Fold                   | Predictive logistic regression models                                                      | Sub-Training (9/10 dataset 1) | Sub-Validation (1/10 dataset 1) | Training (dataset 1) | Validation (dataset 2) |
| 1                      | CP + ITIH4 + LRG1 + MMRN1                                                                  | 0.7377                        | 0.5562                          |                      |                        |
| 2                      | CP + IGHG2 + LRG1 + PON1 + SERPINA3                                                        | 0.7998                        | 0.5444                          |                      |                        |
| 3                      | CP + ITIH4 + LRG1                                                                          | 0.7047                        | 0.7633                          |                      |                        |
| 4                      | ECM1 + IGHG2 + LRG1 + MMRN1 + SERPINA1 + LUM                                               | 0.7725                        | 0.6982                          |                      |                        |
| 5                      | CP + ITIH4 + LRG1 + TIMP1                                                                  | 0.7066                        | 0.7431                          |                      |                        |
| 6                      | CP + MMRN1 + PON1 + SERPINA3                                                               | 0.741                         | 0.7778                          |                      |                        |
| 7                      | APOB + CP + CTSD + IGHG2 + PON1 + SERPINA3 + LUM                                           | 0.8133                        | 0.5278                          |                      |                        |
| 8                      | CP + ITIH4 + LRG1                                                                          | 0.7327                        | 0.5417                          |                      |                        |
| Consensus              | CP+PON1+SERPINA3+LRG1+ITIH4+MMRN1+IGHG2                                                    |                               |                                 | 0.7691               | 0.8516                 |
| <b>Try 3 8-fold CV</b> | <b>Significant proteins selected into logistic regression models by stepwise selection</b> |                               |                                 |                      |                        |
| Fold                   | Predictive logistic regression models                                                      | Sub-Training (9/10 dataset 1) | Sub-Validation (1/10 dataset 1) | Training (dataset 1) | Validation (dataset 2) |
| 1                      | CP + IGHG2 + LGALS3BP + PON1 + SERPINA3 + PRG4                                             | 0.7952                        | 0.6095                          |                      |                        |
| 2                      | CP + MMRN1 + PON1 + SERPINA3                                                               | 0.742                         | 0.7041                          |                      |                        |
| 3                      | CTSD + ECM1 + ITIH4 + LRG1 + ORM1 + SERPINA1 + VTN                                         | 0.777                         | 0.4379                          |                      |                        |
| 4                      | CP + FHR3 + PON1 + SERPINA3 + TIMP1 + SERPINA7 + KNG1                                      | 0.7811                        | 0.5385                          |                      |                        |
| 5                      | CP + ITIH4 + LRG1 + MMRN1                                                                  | 0.7151                        | 0.6458                          |                      |                        |
| 6                      | A1AG2 + CP + ITIH4 + LRG1 + ORM1                                                           | 0.7322                        | 0.5972                          |                      |                        |
| 7                      | ATRN + CP + IGHG2 + PON1 + SERPINA1 + SERPINA3 + TIMP1                                     | 0.8201                        | 0.5972                          |                      |                        |
| 8                      | CP + ITIH4 + LRG1 + MMRN1 + PROC                                                           | 0.7216                        | 0.7361                          |                      |                        |
| Consensus              | CP+PON1+SERPINA3+LRG1+ITIH4                                                                |                               |                                 | 0.7528               | 0.8318                 |



## Appendix Figure S1

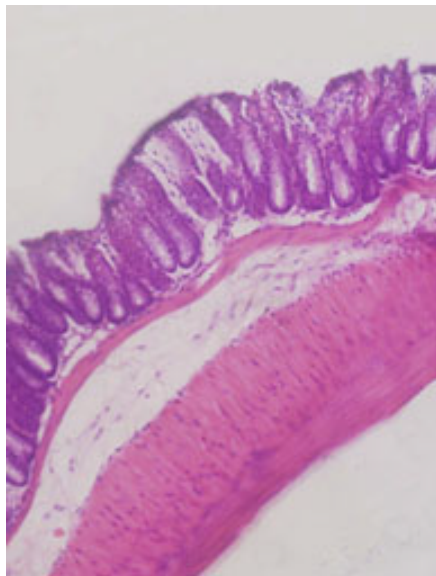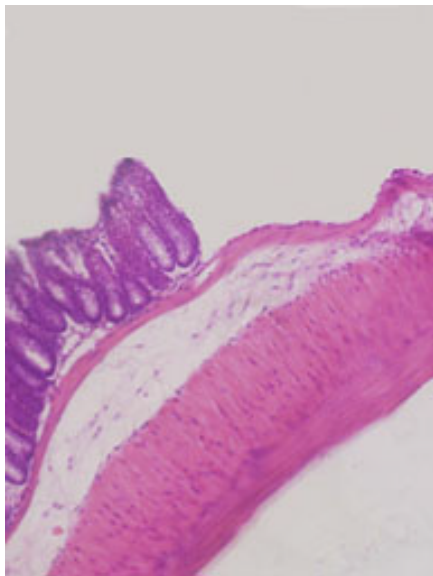

# Appendix Figure S2

## Logistic regression model

$$\ln \frac{\pi(\text{subject}_i)}{1 - \pi(\text{subject}_i)} = -15.146 + 0.730 \times \text{CP}_i - 1.063 \times \text{PON1}_i + 0.686 \times \text{SERPINA3}_i + 0.374 \times \text{LRG1}_i + 0.413 \times \text{TIMP1}_i$$

$\pi(\text{subject}_i)$  : the probability of CRC for ith subject

$\text{CP}_i$  : the estimated log2 intensity of CP for ith subject

$\text{PON1}_i$  : the estimated log2 intensity of PON1 for ith subject

$\text{SERPINA3}_i$  : the estimated log2 intensity of SERPINA3 for ith subject

$\text{LRG1}_i$  : the estimated log2 intensity of LRG1 for ith subject

$\text{TIMP1}_i$  : the estimated log2 intensity of TIMP1 for ith subject

## Standard errors of parameters based on logistic regression model fit

| logistic model | estimate (parameter) | standard error of parameter |
|----------------|----------------------|-----------------------------|
| CP             | 0.7303               | 0.2307                      |
| PON1           | -1.0628              | 0.286                       |
| SERPINA3       | 0.6864               | 0.2925                      |
| LRG1           | 0.3737               | 0.4134                      |
| TIMP1          | 0.4134               | 0.3838                      |

### Appendix Figure S3

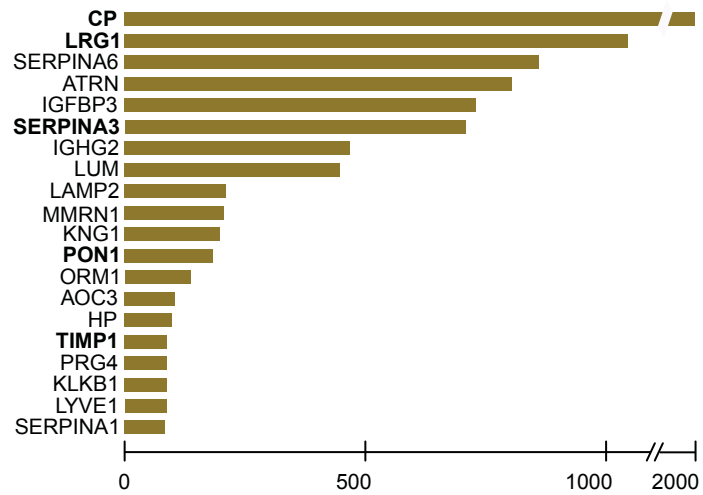

## Appendix Figure S4

**A**

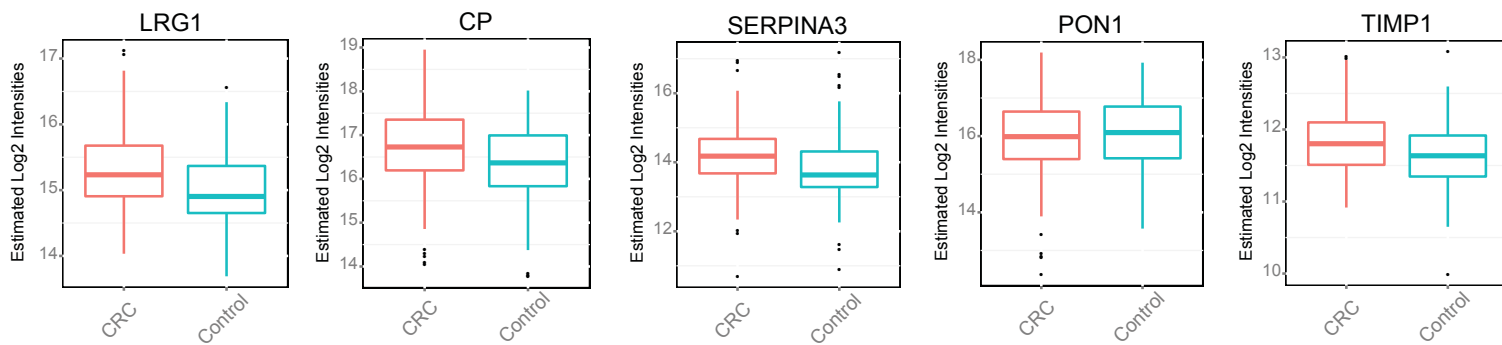

**B**

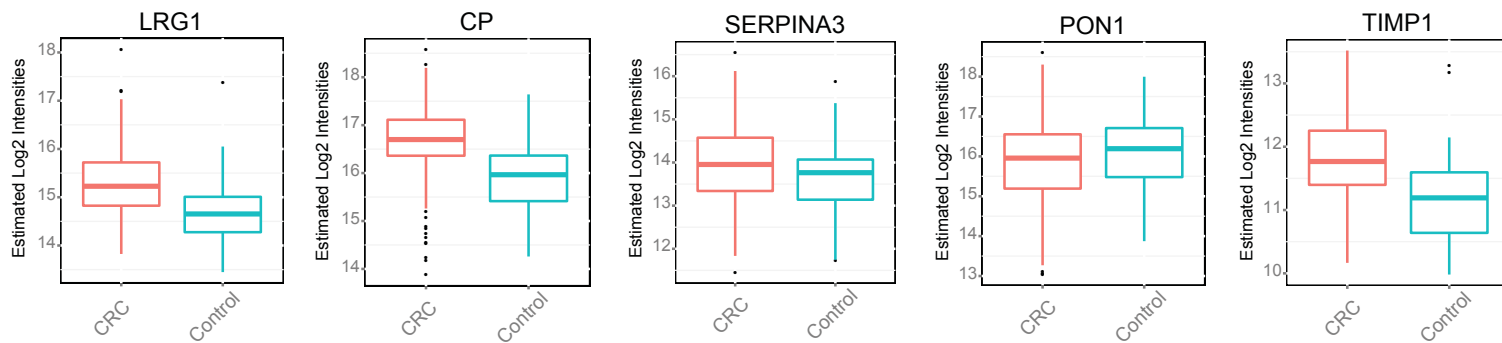

## Appendix Figure S5

### A

#### Sub-control group evaluation

|               | CRC vs all controls |             |          | Pre-lesions<br>(Hyperplastic polyps &<br>non-advanced adenomas) | No lesions<br>(Negative tests) |
|---------------|---------------------|-------------|----------|-----------------------------------------------------------------|--------------------------------|
| fold 1        | specificity         | sensitivity | accuracy | specificity                                                     | specificity                    |
| cutoff=0.361  | 0.5                 | 0.8         | 0.64     | 0.5                                                             | 0.5                            |
| <b>fold 2</b> | specificity         | sensitivity | accuracy | specificity                                                     | specificity                    |
| cutoff=0.401  | 0.6                 | 0.85        | 0.73     | 0.57                                                            | 0.62                           |
| fold 3        | specificity         | sensitivity | accuracy | specificity                                                     | specificity                    |
| cutoff=0.561  | 0.7                 | 0.45        | 0.58     | 0.71                                                            | 0.69                           |
| fold 4        | specificity         | sensitivity | accuracy | specificity                                                     | specificity                    |
| cutoff=0.334  | 0.32                | 0.75        | 0.54     | 0.17                                                            | 0.38                           |
| fold 5        | specificity         | sensitivity | accuracy | specificity                                                     | specificity                    |
| cutoff=0.55   | 0.9                 | 0.55        | 0.72     | 0.83                                                            | 0.92                           |

### B

#### Additional control cohort of subjects with advanced adenomas

|                                         |                |
|-----------------------------------------|----------------|
| n                                       | 50             |
| gender: female/male                     | 21/29          |
| median age: years (25 - 75 % quantiles) | 65 (58.5 - 69) |

#### Class prediction evaluation

|             |      |
|-------------|------|
| Specificity | 0.54 |
|-------------|------|

## Appendix Figure S6

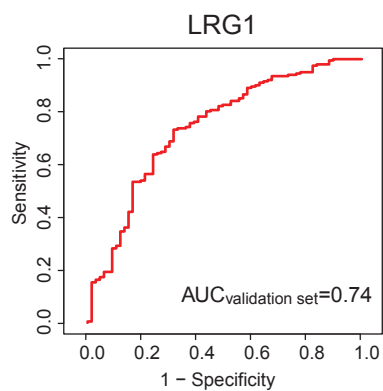

**Validation statistics**

| Threshold | Specificity | Sensitivity | Accuracy |
|-----------|-------------|-------------|----------|
| 0.448     | 0.69        | 0.69        | 0.69     |

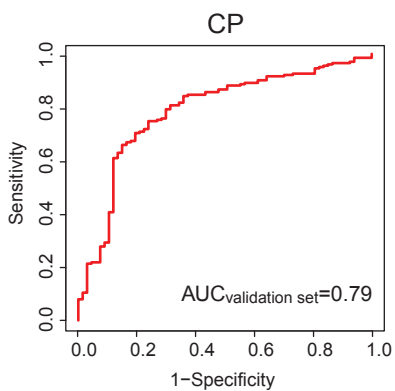

**Validation statistics**

| Threshold | Specificity | Sensitivity | Accuracy |
|-----------|-------------|-------------|----------|
| 0.511     | 0.88        | 0.61        | 0.68     |

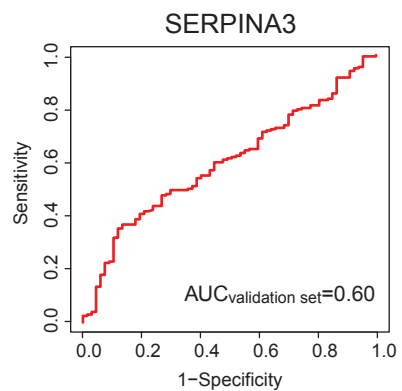

**Validation statistics**

| Threshold | Specificity | Sensitivity | Accuracy |
|-----------|-------------|-------------|----------|
| 0.471     | 0.40        | 0.66        | 0.59     |

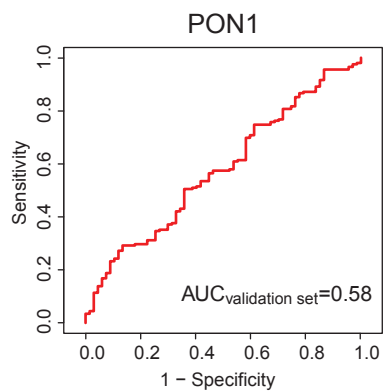

**Validation statistics**

| Threshold | Specificity | Sensitivity | Accuracy |
|-----------|-------------|-------------|----------|
| 0.494     | 0.51        | 0.57        | 0.56     |

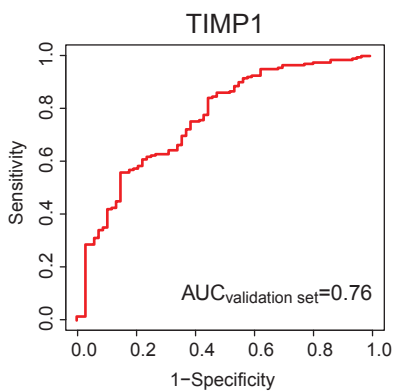

**Validation statistics**

| Threshold | Specificity | Sensitivity | Accuracy |
|-----------|-------------|-------------|----------|
| 0.556     | 0.89        | 0.37        | 0.50     |

# Appendix Figure S7

## Prediction **without** age

| fold     | selected proteins                                      | sub-training | sub-validation |
|----------|--------------------------------------------------------|--------------|----------------|
| 1        | CP + LRG1 + PON1 + SERPINA3                            | 0.75         | 0.75           |
| 2        | CD44 + CP + ITIH4 + LRG1 + ORM1                        | 0.73         | 0.55           |
| 3        | CP + HP + ITIH4 + ORM1 + TIMP1 + PROC                  | 0.74         | 0.58           |
| 4        | LRG1 + MMRN1 + ORM1 + PRG4                             | 0.75         | 0.61           |
| 5        | CP + PON1 + SERPINA3 + TIMP1                           | 0.75         | 0.73           |
| 6        | CP + CTSD + IGHG2 + PON1 + SERPINA3                    | 0.76         | 0.72           |
| 7        | CP + IGHG2 + PON1 + SERPINA3 + TIMP1                   | 0.77         | 0.68           |
| 8        | CP + ECM1 + PON1 + SERPINA3                            | 0.77         | 0.43           |
| 9        | CP + IGHA2 + IGHG2 + LGALS3BP + PON1 + SERPINA3 + PRG4 | 0.79         | 0.74           |
| 10       | CP + FHR3 + FN1 + ITIH4 + LRG1 + TIMP1                 | 0.75         | 0.54           |
| ≥5 folds | <b>CP+PON1+SERPINA3+LRG1+TIMP1</b>                     | 0.75         |                |
|          | <b>validation set</b>                                  | 0.84         |                |

## Prediction **with** age

| fold     | selected proteins                                           | sub-training | sub-validation |
|----------|-------------------------------------------------------------|--------------|----------------|
| 1        | CP + PON1 + SERPINA3 + THBS1 + Age                          | 0.78         | 0.72           |
| 2        | CP + ITIH4 + LRG1 + Age                                     | 0.75         | 0.88           |
| 3        | CP + HP + ITIH4 + LRG1 + PROC + Age                         | 0.78         | 0.57           |
| 4        | MMRN1 + ORM1 + HP + PRG4 + Age                              | 0.76         | 0.72           |
| 5        | CP + ECM1 + FN1 + PON1 + SERPINA3 + TIMP1 + CD44 + Age      | 0.78         | 0.71           |
| 6        | CP + IGHG2 + PON1 + SERPINA3 + Age                          | 0.80         | 0.77           |
| 7        | CP + IGHG2 + PON1 + SERPINA3 + Age                          | 0.80         | 0.73           |
| 8        | CP + ECM1 + PON1 + SERPINA3 + Age                           | 0.79         | 0.58           |
| 9        | CP + IGHG2 + LGALS3BP + PON1 + SERPINA3 + CD44 + PRG4 + Age | 0.83         | 0.67           |
| 10       | CP + FN1 + HP + ITIH4 + LRG1 + Age                          | 0.77         | 0.69           |
| ≥5 folds | Age+CP+PON1+SERPINA3                                        |              |                |
|          | <b>Age+CP+PON1+SERPINA3+LRG1+TIMP1</b>                      | 0.78         |                |
|          | <b>validation set</b>                                       | 0.89         |                |

## Parameters of logistic model with age

|             | estimate | std. error | z value | Pr(> z )  |
|-------------|----------|------------|---------|-----------|
| (Intercept) | -13.911  | 6.180      | -2.251  | 0.024 *   |
| Age         | 0.066    | 0.020      | 3.247   | 0.001 **  |
| CP          | 0.623    | 0.240      | 2.627   | 0.009 **  |
| PON1        | -1.060   | 0.301      | -3.517  | 0.000 *** |
| SERPINA3    | 0.738    | 0.307      | 2.407   | 0.016 *   |
| LRG1        | 0.274    | 0.356      | 0.770   | 0.441     |
| TIMP1       | 0.159    | 0.395      | 0.402   | 0.688     |

## Signature's performance without/with age

### Training set:

AUC difference=0.7806-0.7521=0.0285

p-value=0.1502

### Validation set:

AUC difference=0.8391-0.8914=0.0523

p-value=0.0035

## Appendix Figure S8

**A**

| Fold | AUC       |           |           |           |                 |           |
|------|-----------|-----------|-----------|-----------|-----------------|-----------|
|      | CEA       |           | Signature |           | Signature + CEA |           |
|      | Sub-train | Sub-valid | Sub-train | Sub-valid | Sub-train       | Sub-valid |
| 1    | 0.506     | 0.643     | 0.840     | 0.886     | 0.856           | 0.900     |
| 2    | 0.499     | 0.682     | 0.858     | 0.743     | 0.870           | 0.743     |
| 3    | 0.542     | 0.624     | 0.856     | 0.752     | 0.865           | 0.790     |
| 4    | 0.537     | 0.414     | 0.868     | 0.677     | 0.876           | 0.707     |
| 5    | 0.519     | 0.504     | 0.843     | 0.865     | 0.856           | 0.879     |
| 6    | 0.522     | 0.534     | 0.846     | 0.842     | 0.859           | 0.827     |
| 7    | 0.524     | 0.481     | 0.838     | 0.902     | 0.851           | 0.895     |
| 8    | 0.524     | 0.491     | 0.839     | 0.947     | 0.853           | 0.939     |
| 9    | 0.523     | 0.526     | 0.842     | 0.886     | 0.856           | 0.912     |
| 10   | 0.505     | 0.667     | 0.843     | 0.886     | 0.858           | 0.886     |

**B**

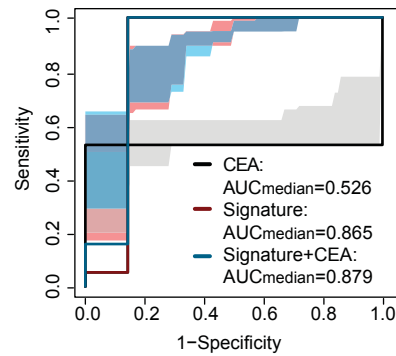

### Signature vs CEA

Paired t-test:  
 mean difference=0.282  
 p-value=5.544e-05  
 95% CI=(0.192, 0.372)

### Signature vs Signature + CEA

Paired t-test:  
 mean difference=-0.009  
 p-value=0.143  
 95% CI=(-0.022, 0.004)
